# Supplementary material for: Label-free impedimetric immunosensing of pathogenic E. coli O157:H7 using amine functionalized carbon
Source: Royal Society of Chemistry journal article supplement (doi:10.1039/d5an00489f), 2025-01-01
Supplement: d5an00489f1.pdf [file d5an00489f1.pdf]

## **Supplementary information**

### **Label-Free Impedimetric Immunosensing of Pathogenic *E. coli* *O157:H7* using Amine Functionalized Carbon**

Pravat Kumar Sahu<sup>a</sup>, Rahul Gangwar<sup>b</sup>, Asha Ramesh<sup>a</sup>, Karri Trinadha Rao<sup>b</sup>, Nitisha Beniwal<sup>c</sup>,  
Aravind Kumar Rengan<sup>c</sup>, Siva Rama Krishna Vanjari<sup>b\*</sup>, Subrahmanyam Challapalli<sup>a\*</sup>

<sup>a</sup>Department of Chemistry, Indian Institute of Technology, Hyderabad, Kandi, Sangareddy,  
Telangana- 502285, India

<sup>b</sup>Department of Electrical Engineering, Indian Institute of Technology, Hyderabad, Kandi,  
Sangareddy, Telangana- 502285, India

<sup>c</sup>Department of Biomedical Engineering, Indian Institute of Technology, Hyderabad, Kandi,  
Sangareddy, Telangana- 502285, India

#### **\*Corresponding Authors:**

**Prof. Subrahmanyam Challapalli**

Email id: [csubbu@iith.ac.in](mailto:csubbu@iith.ac.in)

**Prof. Siva Rama Krishna Vanjari**

Email id: [svanjari@ee.iith.ac.in](mailto:svanjari@ee.iith.ac.in)

## Index

| <b>SL. No</b> | <b>Description</b>                                                                    | <b>Page no.</b> |
|---------------|---------------------------------------------------------------------------------------|-----------------|
| <b>01.</b>    | Electrochemical characterization of fabricated bioelectrode ( <b>Figure S1</b> )..... | <b>S3</b>       |
| <b>02.</b>    | Determination of electrochemical active area ( <b>Table S1</b> ).....                 | <b>S3-S4</b>    |
| <b>03.</b>    | Determination of LOD and Sensitivity ( <b>Table S2, S3,&amp; S4</b> ).....            | <b>S4-S6</b>    |
| <b>04.</b>    | Comparative study ( <b>Figure S2</b> ) .....                                          | <b>S6</b>       |
| <b>05.</b>    | Real-sample analysis ( <b>Figure S3</b> ) .....                                       | <b>S7</b>       |
| <b>06.</b>    | Stability study ( <b>Table -S5</b> ).....                                             | <b>S7</b>       |

## Electrochemical characterization of Bioelectrode

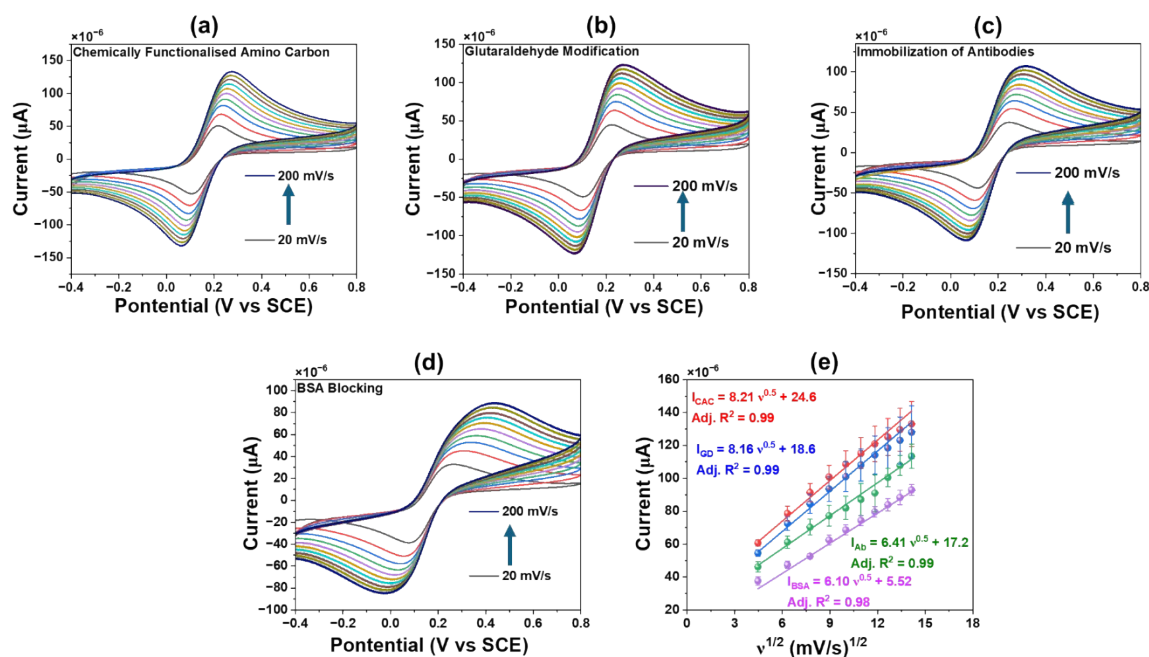

**Figure. S1** CV analysis of bioelectrode fabrication at various scan rates ranging from 20 to 200 mv/s **(a)** chemically functionalised amino carbon, **(b)** Glutaraldehyde activation, **(c)** Immobilization of the antibodies on bioelectrodes, **(d)** BSA blocking of bioelectrodes, and **(e)** calibration plot of the square root of scan rate and current responses during bioelectrode fabrication step.

## Determination of Electrochemical Active area

The electrochemical active area of the bioelectrodes was obtained with the slope of the intensity of the anodic peak current and square root of the scan rate from the Randle - Sevcik equation (**Equation S1**) for the electron-electron transfer process.

$$I_{pa} = (2.69 \times 10^5) n^{3/2} D^{1/2} C_0 A_e v^{1/2} \dots \text{(Equation S1)}$$

Where  $I_{pa}$  = anodic current response

$n$  = Number of electrons involved in the redox process ( $n=1$ )

$D$  = Diffusion coefficient of the electroactive species =  $6.7 \times 10^{-6} \text{ cm}^2/\text{s}$

$C_0$  = Concentration of the electroactive species =  $10 \text{ mM} = 10^{-5} \text{ mol/cm}^2$

$A_e$  = Electrochemically active area

$v$  = Scan rate.

So, equation S1 can be modified as

$$\text{Slope } (\mu\text{A/mV}^{1/2}) = (2.69 \times 10^5) n^{3/2} D^{1/2} C_0 A_e$$

The slope of the anodic sweep from the calibration curve was obtained as  $8.21 \mu\text{A/mV}^{1/2}$ .

$$\text{Slope} = 8.21 \mu\text{A/mV}^{1/2} = 8.21 \times 10^{-6} \text{ A} / (10^{-3} \text{ V})^{1/2} = 2.59 \times 10^{-4} \text{ A/V}^{1/2}$$

Thus, the electrochemical active area ( $A_e$ ) = Slope/( $2.69 \times 10^5$ )  $n^{3/2} D^{1/2} C_o$  = **0.03756 cm<sup>2</sup> = 3.756 mm<sup>2</sup>**.

**Table S1:** Electrochemical active area calculation using Randles–Sevcik equation.

### Electrochemical Active Area Calculation

|                                 |                       |
|---------------------------------|-----------------------|
| CFAC                            | 3.756 mm <sup>2</sup> |
| CFAC/2.5% GD                    | 3.733 mm <sup>2</sup> |
| CFAC/2.5% GD/Ab-E.coli O157     | 2.933 mm <sup>2</sup> |
| CFAC/2.5% GD/Ab-E.coli O157/BSA | 2.791 mm <sup>2</sup> |

### Determination of Limit of Detection (LOD) and Sensitivity

The limit of detection (LOD) of the biosensor was calculated using the statistical method, using the formula  $3\sigma/\text{slope}$ .

Here,  $\sigma$  = Standard deviation of the blank samples (PBS)

To determine the standard deviation of the blank samples, the responses of ten individual electrodes were measured by incubation with the PBS buffer, as tabulated in the **Table. S2**, and found to be  $\sigma = 0.14$  ( $\Delta\Omega/\Omega$ ).

The slope of the calibration plot =  $0.31$  ( $\Delta\Omega/\Omega$ ). (CFU/mL)<sup>-1</sup> ...[Figure 4 (b)]

LOD =  $3\sigma/\text{slope}$

LOD =  $(3 \times 0.14)(\Delta\Omega/\Omega) / 0.31$  ( $\Delta\Omega/\Omega$ ). (CFU/mL)<sup>-1</sup>

**LOD = 1.36 CFU/mL**

The Sensitivity of the bioelectrodes was calculated using the formula,

Sensitivity = Slope/Area

Here, Slope =  $0.31$  ( $\Delta\Omega/\Omega$ ). (CFU/mL)<sup>-1</sup>

Area =  $0.0707$  cm<sup>2</sup> (geometrical area of the Glassy carbon electrode,  $d = 0.3$  cm)

Sensitivity = Slope/Area =  $0.31$  ( $\Delta\Omega/\Omega$ ). (CFU/mL)<sup>-1</sup> ) /  $0.0707$  cm<sup>2</sup>

**Sensitivity = 4.38 (( $\Delta\Omega/\Omega$ )/(CFU/mL))/cm<sup>2</sup>**

**Table S2:** The Blank sample measurement of the bioelectrodes

|                                                   | $R_{ct}$<br>(Bioelectrode) | $R_{ct}$ (Blank) | $\Delta R_{ct}$ | $\Delta R_{ct}/R_{ct}$ |
|---------------------------------------------------|----------------------------|------------------|-----------------|------------------------|
| <b>Bioelectrode-1</b>                             | 1656                       | 1681             | 25              | 0.02                   |
| <b>Bioelectrode-2</b>                             | 1438                       | 1456             | 18              | 0.01                   |
| <b>Bioelectrode-3</b>                             | 1992                       | 2056             | 64              | 0.03                   |
| <b>Bioelectrode-4</b>                             | 1873                       | 2389             | 516             | 0.28                   |
| <b>Bioelectrode-5</b>                             | 1483                       | 1587             | 104             | 0.07                   |
| <b>Bioelectrode-6</b>                             | 1423                       | 1932             | 449             | 0.3                    |
| <b>Bioelectrode-7</b>                             | 1772                       | 2294             | 522             | 0.29                   |
| <b>Bioelectrode-8</b>                             | 1724                       | 1765             | 41              | 0.02                   |
| <b>Bioelectrode-9</b>                             | 1540                       | 2021             | 481             | 0.31                   |
| <b>Bioelectrode-10</b>                            | 1324                       | 1764             | 440             | 0.33                   |
| <b>Average (<math>\Delta\Omega/\Omega</math>)</b> |                            |                  |                 | <b>0.17</b>            |
| <b>Standard Deviation</b>                         |                            |                  |                 | <b>0.14</b>            |

| <b>Concentration<br/>(CFU/mL)</b> | <b>Bioelectrode-1</b> | <b>Bioelectrode-2</b> | <b>Bioelectrode-3</b> | <b>Mean (<math>\Delta\Omega/\Omega</math>)</b> | <b>Standard Deviation</b> |
|-----------------------------------|-----------------------|-----------------------|-----------------------|------------------------------------------------|---------------------------|
| <b>1.5</b>                        | 0.38                  | 0.33                  | 0.34                  | <b>0.35</b>                                    | <b>0.02</b>               |
| <b>15</b>                         | 0.64                  | 0.64                  | 0.67                  | <b>0.65</b>                                    | <b>0.01</b>               |
| <b>150</b>                        | 1.06                  | 0.99                  | 0.99                  | <b>1.01</b>                                    | <b>0.03</b>               |
| <b>1500</b>                       | 1.45                  | 1.19                  | 1.21                  | <b>1.28</b>                                    | <b>0.10</b>               |
| <b>15000</b>                      | 1.71                  | 1.93                  | 1.46                  | <b>1.70</b>                                    | <b>0.16</b>               |
| <b>150000</b>                     | 1.98                  | 2.15                  | 1.71                  | <b>1.95</b>                                    | <b>0.16</b>               |
| <b>1500000</b>                    | 2.15                  | 2.37                  | 2.03                  | <b>2.18</b>                                    | <b>0.13</b>               |

**Table S3.** Data points of the bioelectrodes for electrochemical sensing of *E. coli* O157:H7

The sensor-to-sensor variation in the form of LOD and sensitivity was calculated using the datapoints of **Table S3**.

**Table S4.** Sensor-to-sensor variation in the LOD and Sensitivity

| ELECTRODE       | SLOPE<br>( $\Delta\Omega/\Omega$ ). (CFU/ML) <sup>-1</sup> | LOD<br>(CFU/mL) | SENSITIVITY<br>( $(\Delta\Omega/\Omega)/(\text{CFU/mL})/c$<br>m <sup>2</sup> |
|-----------------|------------------------------------------------------------|-----------------|------------------------------------------------------------------------------|
| Bioelectrode- 1 | 0.31                                                       | 1.36            | 4.36                                                                         |
| Bioelectrode- 2 | 0.36                                                       | 1.17            | 5.09                                                                         |
| Bioelectrode- 3 | 0.27                                                       | 1.56            | 3.82                                                                         |
|                 | Mean                                                       | 1.36            | 4.43                                                                         |
|                 | Standard Deviation                                         | 0.16            | 0.52                                                                         |

The biosensor LOD was found to be  $1.36 \pm 0.16$  CFU/mL and the sensitivity was found to be  $4.43 \pm 0.52$  ( $(\Delta\Omega/\Omega)/(\text{CFU/mL})/c$ )/cm<sup>2</sup>.

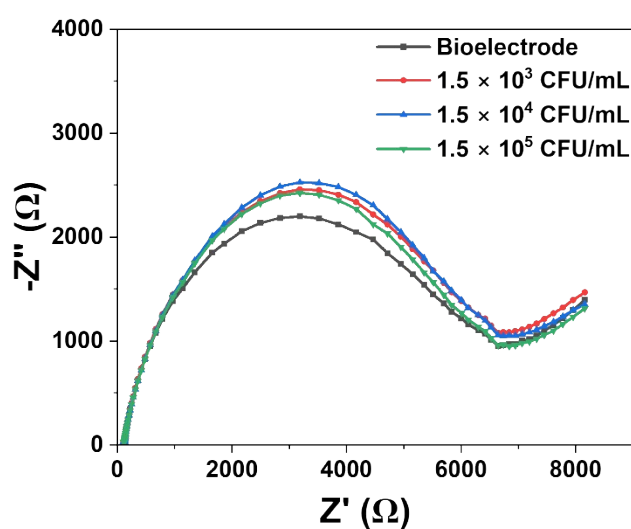

### Comparative study

**Figure S2.** EIS Nyquist plot of electrochemical immunosensing of *E. coli* O157:H7 using non-functionalized graphitic powder.

## Real-Sample Analysis

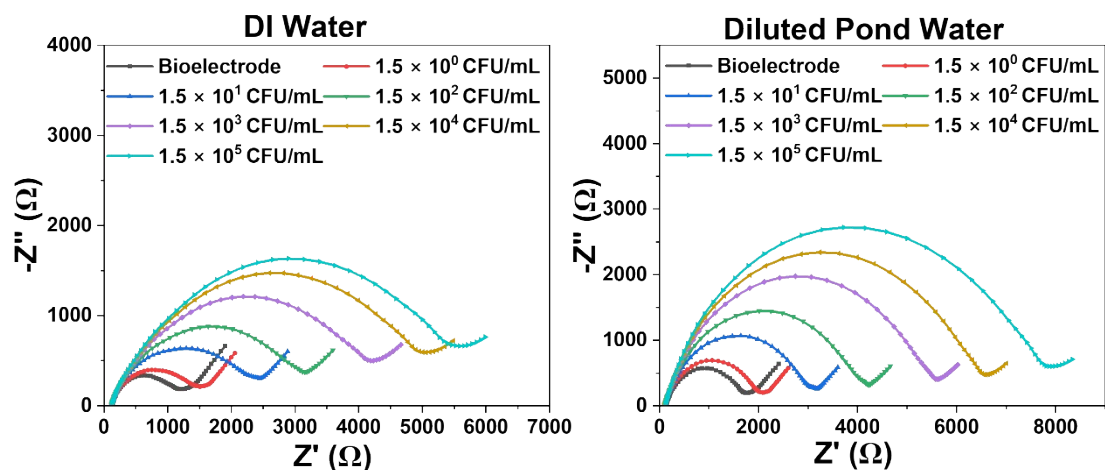

**Figure S3.** Nyquist plots representing the real sample analysis of *E. coli O157:H7* in DI water (left) and in the diluted pond water (right).

**Table S5.** Stability study of the bioelectrodes over time.

| DAY    | $\Delta R_{ct}/R_{ct}$ | Change In Response (%) | Standard Deviation (n =3) |
|--------|------------------------|------------------------|---------------------------|
| DAY-3  | 1.066                  | 6.6                    | 0.032                     |
| DAY-6  | 1.070                  | 7                      | 0.027                     |
| DAY-9  | 1.079                  | 7.9                    | 0.033                     |
| DAY-15 | 1.116                  | 11.6                   | 0.064                     |
